# Supplementary material
Source: Research Square preprint supplement (doi:10.21203/rs.3.rs-9856481/v1)
Supplement: Supplementary file 1 [file 8941b981799b14856902160f.docx]

**Supplementary Material**

**Table 6: SPIRIT 2025 checklist of items to address in a randomized trial protocol***

| **Section / Topic** | **No** | **SPIRIT 2025 checklist item description** | **Reported on page no.** |
| --- | --- | --- | --- |
| **Administrative information** | | |  |
| Title and structured summary | 1a | Title stating the trial design, population, and interventions, with identification as a protocol | 1 |
| 1b | Structured summary of trial design and methods, including items from the World Health Organization Trial Registration Data Set | 1,2 |
| Protocol version | 2 | Version date and identifier | 1 |
| Roles and responsibilities | 3a | Names, affiliations, and roles of protocol contributors | 1,18,19 |
| 3b | Name and contact information for the trial sponsor | 2,18 |
| 3c | Role of trial sponsor and funders in design, conduct, analysis, and reporting of trial; including any authority over these activities | 18 |
| 3d | Composition, roles, and responsibilities of the coordinating site, steering committee, endpoint adjudication committee, data management team, and other individuals or groups overseeing the trial, if applicable | 15 |
| **Open science** | | |  |
| Trial registration | 4 | Name of trial registry, identifying number (with URL), and date of registration. If not yet registered, name of intended registry | 1 |
| Protocol and statistical analysis plan | 5 | Where the trial protocol and statistical analysis plan can be accessed | 15 |
| Data sharing | 6 | Where and how the individual de-identified participant data (including data dictionary), statistical code, and any other materials will be accessible | 15 |
| Funding and conflicts of interest | 7a | Sources of funding and other support (e.g., supply of drugs) | 18 |
| 7b | Financial and other conflicts of interest for principal investigators and steering committee members | 18 |
| Dissemination policy | 8 | Plans to communicate trial results to participants, healthcare professionals, the public, and other relevant groups (e.g., reporting in trial registry, plain language summary, publication) | 2,15 |
| **Introduction** | | |  |
| Background and rationale | 9a | Scientific background and rationale, including summary of relevant studies (published and unpublished) examining benefits and harms for each intervention | 2,3 |
| 9b | Explanation for choice of comparator | 4 |
| Objectives | 10 | Specific objectives related to benefits and harms | 3,18 |
| **Methods: Patient and public involvement, trial design** | | |  |
| Patient and public involvement | 11 | Details of, or plans for, patient or public involvement in the design, conduct, and reporting of the trial | 4 |
| Trial design | 12 | Description of trial design including type of trial (e.g., parallel group, crossover), allocation ratio, and framework (e.g., superiority, equivalence, non-inferiority, exploratory) | 4 |
| **Methods: Participants, interventions, and outcomes** | | |  |
| Trial setting | 13 | Settings (e.g., community, hospital) and locations (e.g., countries, sites) where the trial will be conducted | 4-6 |
| Eligibility criteria | 14a | Eligibility criteria for participants | 5 |
| 14b | If applicable, eligibility criteria for sites and for individuals who will deliver the interventions (e.g., surgeons, physiotherapists) | 6 and supplementary material |
| Intervention and comparator | 15a | Intervention and comparator with sufficient details to allow replication including how, when, and by whom they will be administered. If relevant, where additional materials describing the intervention and comparator (e.g., intervention manual) can be accessed | 14 |
| 15b | Criteria for discontinuing or modifying allocated intervention/comparator for a trial participant (e.g., drug dose change in response to harms, participant request, or improving/worsening disease) | 14,15 |
| 15c | Strategies to improve adherence to intervention/comparator protocols, if applicable, and any procedures for monitoring adherence (e.g., drug tablet return, sessions attended) | 14 |
| 15d | Concomitant care that is permitted or prohibited during the trial | 14 |
| Outcomes | 16 | Primary and secondary outcomes, including the specific measurement variable (e.g., systolic blood pressure), analysis metric (e.g., change from baseline, final value, time to event), method of aggregation (e.g., median, proportion), and time point for each outcome | 9,10 |
| Harms | 17 | How harms are defined and will be assessed (e.g., systematically, non-systematically) | 15 |
| Participant timeline | 18 | Time schedule of enrollment, interventions (including any run-ins and washouts), assessments, and visits for participants. A schematic diagram is highly recommended (see Figure) | 13 |
| Sample size | 19 | How sample size was determined, including all assumptions supporting the sample size calculation | 7 |
| Recruitment | 20 | Strategies for achieving adequate participant enrollment to reach target sample size | 7 |
| **Methods: Assignment of interventions** | | |  |
| Randomization: |  |  |  |
| Sequence generation | 21a | Who will generate the random allocation sequence, and the method used | 7 |
| 21b | Type of randomization (simple or restricted) and details of any factors for stratification. To reduce predictability of a random sequence, other details of any planned restriction (e.g., blocking) should be provided in a separate document that is unavailable to those who enroll participants or assign interventions | 7 |
| Allocation concealment  mechanism | 22 | Mechanism used to implement the random allocation sequence (e.g., central computer/telephone; sequentially numbered, opaque, sealed containers), describing any steps to conceal the sequence until interventions are assigned | 7 |
| Implementation | 23 | Whether the personnel who will enroll and those who will assign participants to the interventions will have access to the random allocation sequence | 7 |
| Blinding | 24a | Who will be blinded after assignment to interventions (e.g., participants, care providers, outcome assessors, data analysts) | 7 |
| 24b | If blinded, how blinding will be achieved and description of the similarity of interventions | 7 |
| 24c | If blinded, circumstances under which unblinding is permissible, and procedure for revealing a participant’s allocated intervention during the trial | 7 |
| **Methods: Data collection, management, and analysis** | | |  |
| Data collection methods | 25a | Plans for assessment and collection of trial data, including any related processes to promote data quality (e.g., duplicate measurements, training of assessors) and a description of trial instruments (e.g., questionnaires, laboratory tests) along with their reliability and validity, if known. Reference to where data collection forms can be accessed, if not in the protocol | 8 |
| 25b | Plans to promote participant retention and complete follow-up, including list of any outcome data to be collected for participants who discontinue or deviate from intervention protocols | 8,15 |
| Data management | 26 | Plans for data entry, coding, security, and storage, including any related processes to promote data quality (e.g., double data entry; range checks for data values). Reference to where details of data management procedures can be accessed, if not in the protocol | 8,15 |
| Statistical methods | 27a | Statistical methods used to compare groups for primary and secondary outcomes, including harms | 8-9,15 |
| 27b | Definition of who will be included in each analysis (e.g., all randomized participants), and in which group | 9,15 |
| 27c | How missing data will be handled in the analysis | 15 |
| 27d | Methods for any additional analyses (e.g., subgroup and sensitivity analyses) | 15 |
| **Methods: Monitoring** | | |  |
| Data monitoring committee | 28a | Composition of data monitoring committee (DMC); summary of its role and reporting structure; statement of whether it is independent from the sponsor and funder; conflicts of interest and reference to where further details about its charter can be found, if not in the protocol. Alternatively, an explanation of why a DMC is not needed | 15 |
| 28b | Explanation of any interim analyses and stopping guidelines, including who will have access to these interim results and make the final decision to terminate the trial | 15 |
| Trial monitoring | 29 | Frequency and procedures for monitoring trial conduct. If there is no monitoring, give explanation | 15 |
| **Ethics** | | |  |
| Research ethics approval | 30 | Plans for seeking research ethics committee/institutional review board approval | 2,15 |
| Protocol amendments | 31 | Plans for communicating important protocol modifications to relevant parties | 15 |
| Consent or assent | 32a | Who will obtain informed consent or assent from potential trial participants or authorized proxies, and how | 7,15 |
| 32b | Additional consent provisions for collection and use of participant data and biological specimens in ancillary studies, if applicable | N/A |
| Confidentiality | 33 | How personal information about potential and enrolled participants will be collected, shared, and maintained in order to protect confidentiality before, during, and after the trial | 15 |
| Ancillary and post-trial care | 34 | Provisions, if any, for ancillary and post-trial care, and for compensation to those who suffer harm from trial participation | 15 |

## **Table 7: Eligibility Criteria for Providers**

| Peer Support Workers | Peer Support Workers (PSWs) are people with lived experience of psychosis who use this experience to support others, in line with the SUCCEED Intervention Manual. PSWs are hired to positions within an existing not-for-profit organisation (civil society organisations or other non-governmental organisations) and therefore may be subject to further eligibility requirements. For the purposes of SUCCEED, PSWs must:   1. Have lived experience of psychosis and be “on the road to recovery”, such that they are able to cope with the basic demands of the work (though it is understood that further support may well be required at times, and reasonable accommodation will be given where necessary). 2. Have the literacy, numeracy and fluency in the local language required to successfully complete training and deliver the intervention. We expect this would require at least a secondary school level of education, or equivalent. 3. Live in close enough proximity to the study area to carry out their duties effectively. |
| --- | --- |
| Community Support Workers | Community Support Workers take a case management approach to facilitate access to community resources, with special attention to the various domains of the CBR Matrix, as per SUCCEED’s Intervention Manual. CSWs may be hired or be existing staff of an existing not-for-profit organisation (civil society organisations (CSO) or other non-governmental organisations (NGO)) and therefore may be subject to further eligibility requirements. For the purposes of SUCCEED, CSWs must:   1. Have minimum three years of secondary education. 2. Have the literacy, numeracy and fluency in the local language required to successfully complete training, deliver the intervention and participate in supervision sessions. 3. Live locally and know the local community, to understand the different resources that are available in communities and have established relationships. |
| **Supervisors** | Supervisors are people in managerial positions within the organisation hosting the SUCCEED intervention (or who are hired for the delivery in the intervention), who are accountable for the delivery of the intervention. Consequently, they may be subject to further eligibility requirements of the host organisation. For the purposes of SUCCEED, supervisors:   1. Must have completed six years of secondary education. 2. Must have the literacy, numeracy, and fluency in the local language necessary to complete training, supervise the intervention delivery, line manage the CSW and PSW, and prepare reports on implementation and research activities to be submitted to the local SUCCEED study team. |

**Table 8: Intervention Development Stages**

| **Stage 1: Generating evidence for what works for psychosis in Sub-Saharan Africa** |
| --- |
| In the first year of the SUCCEED project, systematic and desk reviews were conducted collaboratively by all five teams (LSHTM, Malawi, Nigeria, Sierra Leone, and Zimbabwe). These reviews included systematic investigations of interventions for psychosis in Africa4 and community-based rehabilitation (CBR) interventions in low- and middle-income countries (LMICs)16. This was alongside a situation analysis of the available resources for psychosis in each participating SUCCEED country18. The systematic reviews revealed that interventions for people living with psychosis primarily focused on psychological and clinical outcomes, with most efforts taking place in community settings. The situation analysis indicated a significant lack of involvement of individuals with psychosocial disabilities in research, service development, advocacy, and policy-making. Major gaps were identified in inclusive community-based mental health care, alongside pervasive stigma. |
| **Stage 2: Development of the Theory of Change Map** |
| Findings from Stage 1, informed in-country stakeholder workshops, resulting in country-specific Theory of Change (ToC) maps. A cross-site ToC was subsequently developed during a virtual meeting that included SUCCEED teams from all participating countries. The cross-site TOC articulated assumptions, interventions, and short-term, mid-term, and long-term outcomes which are essential for people living with disabilities in sub-Saharan Africa to achieve improved quality of life, greater choice in care, and participate fully in their communities. Core intervention domains were distilled to three areas: access to community resources, peer support, and sustained livelihoods [See Appendix 1]. |
| **Stage 3: Testing the assumptions of the Theory of Change Map via qualitative formative research** |
| ToC assumptions informed the foundation for the formative research, which aimed to understand the context, needs, acceptability, feasibility, and appropriateness of the proposed SUCCEED intervention. Key informant interviews and focus groups were conducted with people living with psychosis, their family members, members of organizations representing people with psychosocial disabilities, health and education professionals, policymakers in health and education, as well as traditional and faith-based healers. Findings revealed a significant lack of community-inclusive rehabilitation services and multiple barriers to achieving a good quality of life, including limited access to formal healthcare, stigma and discrimination. Interestingly, stakeholders expressed strong willingness to engage in any form of collaboration. |
| **Stage 4:** **Refinement of the Theory of Change Map** |
| Formative research results and peer researcher feedback were incorporated into the intervention design. The intervention was piloted with 10 people with lived experience of psychosis and their families. Lessons related to feasibility, acceptability and implementation logistics informed further refinement of the intervention package. |

**Table 9: Family Awareness of Needs Questionairre**

| Family awareness of needs, rights and experiences | |
| --- | --- |
| What is your relationship to *<insert name of participant>* | Child, spouse, mother, father, sibling brother/sister, grandmother, grandfather, other (specify) |
| At times it may be necessary to restrain (chain or tie up) someone with lived experience of psychosis | Strongly disagree, disagree, neither agree or disagree, agree, strongly agree |
| People with lived experience of psychosis can be included in family gatherings | Strongly disagree, disagree, neither agree or disagree, agree, strongly agree |
| People with lived experience of psychosis can be included in community gatherings (e.g. village meetings, wedding ceremonies, naming ceremonies or funerals) | Strongly disagree, disagree, neither agree or disagree, agree, strongly agree |
| At times it may be necessary to isolate someone with lived experience of psychosis (lock them in a room) | Strongly disagree, disagree, neither agree or disagree, agree, strongly agree |
| People with lived experience of psychosis can be given responsibilities | Strongly disagree, disagree, neither agree or disagree, agree, strongly agree |
| At times it may be necessary to withhold food from someone with lived experience of psychosis | Strongly disagree, disagree, neither agree or disagree, agree, strongly agree |
| At times it may be necessary to beat someone with lived experience of psychosis | Strongly disagree, disagree, neither agree or disagree, agree, strongly agree |
| People with lived experience of psychosis can go to go to school/college | Strongly disagree, disagree, neither agree or disagree, agree, strongly agree |
| People with lived experience of psychosis can acquire a skill | Strongly disagree, disagree, neither agree or disagree, agree, strongly agree |
| People with lived experience of psychosis can get a good education | Strongly disagree, disagree, neither agree or disagree, agree, strongly agree |
| People with lived experience of psychosis can be successful in their job or business | Strongly disagree, disagree, neither agree or disagree, agree, strongly agree |
| People with lived experience of psychosis can get married | Strongly disagree, disagree, neither agree or disagree, agree, strongly agree |
| People with lived experience of psychosis can be good parents | Strongly disagree, disagree, neither agree or disagree, agree, strongly agree |
| People with lived experience of psychosis can go to religious activities (such as church service, mosque or traditional events) | Strongly disagree, disagree, neither agree or disagree, agree, strongly agree |
| A caregiver should spend time trying to learn what triggers (activates/upsets) a person with lived experience of psychosis | Strongly disagree, disagree, neither agree or disagree, agree, strongly agree |
| It is possible for someone to recover from psychosis | Strongly disagree, disagree, neither agree or disagree, agree, strongly agree |
| People with lived experience of psychosis can manage money well. | Strongly disagree, disagree, neither agree or disagree, agree, strongly agree |
| People with lived experience of psychosis can have a bad influence on each other | Strongly disagree, disagree, neither agree or disagree, agree, strongly agree |
| It is important for people with lived experience of psychosis to feel emotionally supported | Strongly disagree, disagree, neither agree or disagree, agree, strongly agree |
| People with lived experience of psychosis can be allowed to make their own decisions | Strongly disagree, disagree, neither agree or disagree, agree, strongly agree |

**Table 10: Family Perception of Care Burden**

| We will ask you questions about *<insert name of participant>* and their condition | |
| --- | --- |
| What is your relationship to *<insert name of participant>* | Child, spouse, mother, father, sibling (brother/sister), grandparent, other (specify) |
| **In the last 2 weeks:** |  |
| I am happy to have *<insert name of participant>* around. | Every day, most days, some days, very rarely, never |
| I feel very close to *<insert name of participant>*. | Every day, most days, some days, very rarely, never |
| I feel very frustrated with *<insert name of participant>*. | Every day, most days, some days, very rarely, never |
| I feel it is becoming easier to live with *<insert name of participant>*. | Every day, most days, some days, very rarely, never |
| *<insert name of participant>* appreciates what I do for them. | Every day, most days, some days, very rarely, never |
| I feel my mental health is adversely affected due to caring for *<insert name of participant>*. | Every day, most days, some days, very rarely, never |
| I feel *<insert name of participant>* ignores my advice on purpose. | Every day, most days, some days, very rarely, never |
| I lose my temper a lot with *<insert name of participant>*. | Every day, most days, some days, very rarely, never |
| I argue a lot with *<insert name of participant>*. | Every day, most days, some days, very rarely, never |
| I find myself saying mean or sarcastic things to *<insert name of participant>*. | Every day, most days, some days, very rarely, never |
| I feel *<insert name of participant>* says things just to anger me. | Every day, most days, some days, very rarely, never |
| I feel *<insert name of participant>* causes me problems on purpose. | Every day, most days, some days, very rarely, never |
| I feel *<insert name of participant>* is a burden. | Every day, most days, some days, very rarely, never |
| *<insert name of participant>* is easy to get along with. | Every day, most days, some days, very rarely, never |
| I feel *<insert name of participant>* has the ability to control themselves, but doesn’t | Every day, most days, some days, very rarely, never |
